# Supplementary material for: Adherence to the 2018 World Cancer Research Fund/American Institute for Cancer Research cancer prevention recommendations and pancreatic cancer incidence and mortality: A prospective cohort study
Source: PubMed Central journal article supplement (PMC7520356; doi:10.1002/cam4.3348), 2020-07-27
Supplement: CAM4-9-6843-s001.pdf [file CAM4-9-6843-s001.pdf]

**SUPPLEMENTAL MATERIAL**

**Adherence to the 2018 World Cancer Research Fund/American Institute for  
Cancer Research cancer prevention recommendations and pancreatic cancer  
incidence and mortality: a prospective cohort study**

Zhi-Qing Zhang, Qu-Jin Li, Fa-Bao Hao, You-Qi-Le Wu, Shan Liu, and Guo-Chao

Zhong

**Supplemental Table 1.** The 2018 WCRF/AICR recommendations for cancer prevention and adherence score construction in the Prostate, Lung, Colorectal, and Ovarian Cancer Screening Trial

| WCRF/AICR recommendations                                                                   | Baseline data                                     | Operationalization                          | Score | Number of participants (%) |
|---------------------------------------------------------------------------------------------|---------------------------------------------------|---------------------------------------------|-------|----------------------------|
| Be a healthy weight                                                                         | BMI (kg/m <sup>2</sup> )                          | 18.5–24.9                                   | 1     | 32350 (33.7)               |
|                                                                                             |                                                   | 25.0–29.9                                   | 0.5   | 40977 (42.7)               |
|                                                                                             |                                                   | <18.5 or ≥30.0                              | 0     | 22635 (23.6)               |
| Be physically active                                                                        | Moderate to vigorous physical activity (min/week) | ≥150                                        | 1     | 31539 (32.9)               |
|                                                                                             |                                                   | 75 to <150                                  | 0.5   | 20916 (21.8)               |
|                                                                                             |                                                   | <75                                         | 0     | 43507 (45.3)               |
| Eat a diet rich in whole grains, vegetables, fruit, and beans                               | Fruits and vegetables (g/day)                     | ≥400                                        | 1     | 62265 (64.9)               |
|                                                                                             |                                                   | 200 to <400                                 | 0.5   | 26657 (27.8)               |
|                                                                                             |                                                   | <200                                        | 0     | 7040 (7.3)                 |
|                                                                                             | Dietary fiber (g/day)                             | ≥30                                         | 1     | 8209 (8.6)                 |
|                                                                                             |                                                   | 15 to <30                                   | 0.5   | 48168 (50.2)               |
|                                                                                             |                                                   | <15                                         | 0     | 39585 (41.3)               |
| Limit consumption of “fast foods” and other processed foods high in fat, starches or sugars | Ultra-processed foods (g/day)                     | Tertile 1: ≤142.9                           | 1     | 31991 (33.4)               |
|                                                                                             |                                                   | Tertile 2: 143.0–233.9                      | 0.5   | 31985 (33.3)               |
|                                                                                             |                                                   | Tertile 3: ≥234.0                           | 0     | 31986 (34.8)               |
| Limit consumption of red and processed meat                                                 | Red meat and processed meat (g/week)              | Red meat <500 and processed meat <21        | 1     | 69636 (72.6)               |
|                                                                                             |                                                   | Red meat <500 and processed meat 21 to <100 | 0.5   | 25667 (26.7)               |
|                                                                                             |                                                   | Red meat ≥500 or processed meat ≥100        | 0     | 659 (0.7)                  |
| Limit consumption of sugar-sweetened drinks                                                 | Fruit or vegetable drinks and soft drinks (g/day) | 0                                           | 1     | 11713 (12.2)               |
|                                                                                             |                                                   | >0 to ≤250                                  | 0.5   | 64780 (67.5)               |
|                                                                                             |                                                   | >250                                        | 0     | 19469 (20.3)               |

|                                               |                                                         |                                                     |     |              |
|-----------------------------------------------|---------------------------------------------------------|-----------------------------------------------------|-----|--------------|
| Limit alcohol consumption                     | Alcohol intake (g/day)                                  | 0                                                   | 1   | 24171 (25.2) |
|                                               |                                                         | >0 to $\leq 28$ for males and $\leq 14$ for females | 0.5 | 59666 (62.2) |
|                                               |                                                         | >28 for males and >14 for females                   | 0   | 12125 (12.6) |
| For mothers: breastfeed your baby, if you can | Cumulative duration of exclusive breastfeeding (months) | $\geq 6$                                            | 1   | 15515 (16.2) |
|                                               |                                                         | <6                                                  | 0.5 | 13399 (14.0) |
|                                               |                                                         | 0                                                   | 0   | 67048 (69.9) |

---

**Supplemental Table 2.** Hazard ratios of the association between WCRF/AICR score and pancreatic cancer incidence in 77557 participants with complete data

| Tertiles of WCRF/AICR score<br>(range) | Number of<br>cases | Person-years | Incidence/10000<br>person-years | Hazard ratio (95% confidence interval) |                      |                      |
|----------------------------------------|--------------------|--------------|---------------------------------|----------------------------------------|----------------------|----------------------|
|                                        |                    |              |                                 | Unadjusted                             | Model 1 <sup>a</sup> | Model 2 <sup>b</sup> |
| <b>Overall WCRF/AICR score</b>         |                    |              |                                 |                                        |                      |                      |
| Tertile 1 (0.50–3.75)                  | 91                 | 167562.2     | 5.43                            | 1.00 (reference)                       | 1.00 (reference)     | 1.00 (reference)     |
| Tertile 2 (4.00–4.75)                  | 103                | 246089.1     | 4.19                            | 0.77 (0.58, 1.02)                      | 0.76 (0.57, 1.02)    | 0.76 (0.57, 1.02)    |
| Tertile 3 (5.00–8.00)                  | 83                 | 277480.1     | 2.99                            | 0.55 (0.41, 0.74)                      | 0.56 (0.40, 0.78)    | 0.56 (0.40, 0.77)    |
| <i>P</i> <sub>trend</sub>              |                    |              |                                 | <0.0001                                | 0.0005               | 0.0005               |
| Continuous (1-point increment)         | 277                | 691131.4     | 4.01                            | 0.81 (0.72, 0.91)                      | 0.81 (0.71, 0.93)    | 0.81 (0.71, 0.93)    |
| <b>Dietary WCRF/AICR score</b>         |                    |              |                                 |                                        |                      |                      |
| Tertile 1 (0.50–2.75)                  | 86                 | 196342.0     | 4.38                            | 1.00 (reference)                       | 1.00 (reference)     | 1.00 (reference)     |
| Tertile 2 (3.00–3.25)                  | 82                 | 189702.3     | 4.32                            | 0.99 (0.73, 1.33)                      | 0.95 (0.70, 1.30)    | 0.96 (0.70, 1.31)    |
| Tertile 3 (3.50–5.00)                  | 109                | 305087.1     | 3.57                            | 0.82 (0.61, 1.08)                      | 0.77 (0.56, 1.05)    | 0.78 (0.57, 1.06)    |
| <i>P</i> <sub>trend</sub>              |                    |              |                                 | 0.1245                                 | 0.0800               | 0.0906               |
| Continuous (1-point increment)         | 277                | 691131.4     | 4.01                            | 0.86 (0.72, 1.03)                      | 0.82 (0.68, 1.00)    | 0.83 (0.68, 1.01)    |

Abbreviation: WCRF/AICR, World Cancer Research Fund and American Institute for Cancer Research.

<sup>a</sup> Adjusted for variables determined by change-in-estimate strategy, namely age (years), sex (male, female), smoking status (current, former, never), history of diabetes (yes, no), and total energy intake (kcal/day).

<sup>b</sup> Adjusted for age (years), sex (male, female), race (non-Hispanic white, non-Hispanic black, Hispanic, others), educational degree (college below, college graduate, postgraduate), smoking status (current, former, never), aspirin use (yes, no), history of diabetes (yes, no), family history of pancreatic cancer (yes, no), and total energy intake (kcal/day). For the association of dietary WCRF/AICR score with pancreatic cancer incidence, model 2 was further adjusted for body mass index (kg/m<sup>2</sup>) and moderate to vigorous activity (min/week).

**Supplemental Table 3.** Sensitivity analyses on the association between WCRF/AICR score and pancreatic cancer incidence

| Tertiles of WCRF/AICR score<br>(range) | Hazard ratio (95% confidence interval) <sup>a</sup>                            |                                                                                     |
|----------------------------------------|--------------------------------------------------------------------------------|-------------------------------------------------------------------------------------|
|                                        | Excluding cases occurring<br>within the first two years<br>of follow-up (n=58) | Excluding subjects with<br>extreme values of energy<br>intake (n=2684) <sup>b</sup> |
| Overall WCRF/AICR score                |                                                                                |                                                                                     |
| Tertile 1                              | 1.00 (reference)                                                               | 1.00 (reference)                                                                    |
| Tertile 2                              | 0.96 (0.72, 1.28)                                                              | 0.90 (0.69, 1.16)                                                                   |
| Tertile 3                              | 0.72 (0.51, 1.00)                                                              | 0.67 (0.49, 0.91)                                                                   |
| <i>P</i> <sub>trend</sub>              | 0.0626                                                                         | 0.0125                                                                              |
| Continuous (1-point increment)         | 0.90 (0.80, 1.03)                                                              | 0.87 (0.78, 0.98)                                                                   |
| Dietary WCRF/AICR score                |                                                                                |                                                                                     |
| Tertile 1                              | 1.00 (reference)                                                               | 1.00 (reference)                                                                    |
| Tertile 2                              | 1.14 (0.84, 1.55)                                                              | 1.04 (0.78, 1.38)                                                                   |
| Tertile 3                              | 0.86 (0.63, 1.19)                                                              | 0.84 (0.62, 1.12)                                                                   |
| <i>P</i> <sub>trend</sub>              | 0.2228                                                                         | 0.1641                                                                              |
| Continuous (1-point increment)         | 0.87 (0.71, 1.06)                                                              | 0.85 (0.71, 1.02)                                                                   |

Abbreviation: WCRF/AICR, World Cancer Research Fund and American Institute for Cancer Research.

<sup>a</sup> Adjusted for age (years), sex (male, female), race (non-Hispanic white, non-Hispanic black, Hispanic, others), educational level (college below, college graduate, postgraduate), smoking status (current, former, never), aspirin use (yes, no), history of diabetes (yes, no), family history of pancreatic cancer (yes, no), and total energy intake (kcal/day). For the association of dietary WCRF/AICR score with pancreatic cancer incidence, model 2 was further adjusted for body mass index (kg/m<sup>2</sup>) and moderate to vigorous activity (min/week).

<sup>b</sup> Extreme values of energy intake are defined as <800 or >4000 kcal/d for men and <500 or >3500 kcal/d for women.

**Supplemental Table 4.** Associations of adherence to individual WCRF/AICR cancer prevention recommendations with pancreatic cancer incidence

| WCRF/AICR components                                          | Number of cases | Person-years | Hazard ratio (95% confidence interval) <sup>a</sup> | <i>P</i> <sub>trend</sub> |
|---------------------------------------------------------------|-----------------|--------------|-----------------------------------------------------|---------------------------|
| Be a healthy weight                                           |                 |              |                                                     |                           |
| 0                                                             | 82              | 196471.8     | 1.00 (reference)                                    | 0.8146                    |
| 0.5                                                           | 143             | 364285.5     | 0.91 (0.69, 1.20)                                   |                           |
| 1                                                             | 112             | 289973.4     | 0.96 (0.71, 1.29)                                   |                           |
| Be physically active                                          |                 |              |                                                     |                           |
| 0                                                             | 179             | 382252.5     | 1.00 (reference)                                    | 0.0377                    |
| 0.5                                                           | 71              | 186319.3     | 0.91 (0.69, 1.20)                                   |                           |
| 1                                                             | 87              | 282158.9     | 0.75 (0.58, 0.98)                                   |                           |
| Eat a diet rich in whole grains, vegetables, fruit, and beans |                 |              |                                                     |                           |
| 0                                                             | 27              | 56980.9      | 1.00 (reference)                                    | 0.6664                    |
| 0.25                                                          | 70              | 180441.1     | 0.88 (0.56, 1.38)                                   |                           |
| 0.5                                                           | 65              | 169194.1     | 0.90 (0.56, 1.42)                                   |                           |
| 0.75                                                          | 150             | 372377.8     | 1.01 (0.64, 1.58)                                   |                           |
| 1                                                             | 25              | 71736.8      | 0.95 (0.49, 1.83)                                   |                           |
| Limit consumption of ultra-processed foods                    |                 |              |                                                     |                           |
| 0                                                             | 120             | 284464.0     | 1.00 (reference)                                    | 0.7891                    |
| 0.5                                                           | 102             | 284794.4     | 0.84 (0.62, 1.14)                                   |                           |
| 1                                                             | 115             | 281472.3     | 0.94 (0.66, 1.34)                                   |                           |
| Limit consumption of red and processed meat                   |                 |              |                                                     |                           |
| 0                                                             | 6               | 5700.4       | 1.00 (reference)                                    | 0.2827                    |
| 0.5                                                           | 96              | 225612.9     | 0.39 (0.17, 0.90)                                   |                           |
| 1                                                             | 235             | 619417.4     | 0.37 (0.16, 0.86)                                   |                           |
| Limit consumption of sugar-sweetened drinks                   |                 |              |                                                     |                           |
| 0                                                             | 76              | 171716.6     | 1.00 (reference)                                    | 0.0854                    |
| 0.5                                                           | 227             | 575246.4     | 0.88 (0.67, 1.15)                                   |                           |
| 1                                                             | 34              | 103767.7     | 0.69 (0.45, 1.05)                                   |                           |
| Limit alcohol consumption                                     |                 |              |                                                     |                           |
| 0                                                             | 46              | 107670.0     | 1.00 (reference)                                    | 0.4144                    |
| 0.5                                                           | 205             | 530430.7     | 0.85 (0.61, 1.19)                                   |                           |
| 1                                                             | 86              | 212630.0     | 0.83 (0.56, 1.22)                                   |                           |
| For mothers: breastfeed your baby, if you can                 |                 |              |                                                     |                           |
| 0                                                             | 57              | 181897.0     | 1.00 (reference)                                    | 0.7975                    |
| 0.5                                                           | 47              | 120323.0     | 1.18 (0.80, 1.74)                                   |                           |
| 1                                                             | 41              | 138539.5     | 0.93 (0.62, 1.40)                                   |                           |

<sup>a</sup> Adjusted for age (years), sex (male, female) (except the component “for mothers: breastfeed your baby, if you can”), race (non-Hispanic white, non-Hispanic black, Hispanic, others), educational degree (college below, college graduate, postgraduate), smoking status (current, former, never), aspirin use (yes, no), history of diabetes (yes, no), family history of pancreatic cancer (yes, no), and total energy intake (kcal/day). All individual components were mutually adjusted.

**Supplemental Table 5.** Subdistribution hazard ratios of the association of WCRF/AICR score with pancreatic cancer mortality in 77557 participants with complete data.

| Tertiles of WCRF/AICR score<br>(range) | Number of<br>deaths | Person-years | Mortality/10000<br>person-years | Subdistribution hazard ratio (95% confidence interval) |                      |                      |
|----------------------------------------|---------------------|--------------|---------------------------------|--------------------------------------------------------|----------------------|----------------------|
|                                        |                     |              |                                 | Unadjusted                                             | Model 1 <sup>a</sup> | Model 2 <sup>b</sup> |
| Overall WCRF/AICR score                |                     |              |                                 |                                                        |                      |                      |
| Tertile 1 (0.50–3.75)                  | 80                  | 249068.2     | 3.21                            | 1.00 (reference)                                       | 1.00 (reference)     | 1.00 (reference)     |
| Tertile 2 (4.00–4.75)                  | 97                  | 369617.8     | 2.62                            | 0.82 (0.61, 1.11)                                      | 0.81 (0.60, 1.10)    | 0.81 (0.60, 1.10)    |
| Tertile 3 (5.00–8.00)                  | 75                  | 421666.4     | 1.78                            | 0.56 (0.41, 0.77)                                      | 0.56 (0.39, 0.80)    | 0.56 (0.39, 0.80)    |
| <i>P</i> <sub>trend</sub>              |                     |              |                                 | 0.0003                                                 | 0.0011               | 0.0011               |
| Continuous (1-point increment)         | 252                 | 1040352.3    | 2.42                            | 0.83 (0.73, 0.93)                                      | 0.83 (0.72, 0.95)    | 0.83 (0.72, 0.95)    |
| Dietary WCRF/AICR score                |                     |              |                                 |                                                        |                      |                      |
| Tertile 1 (0.50–2.75)                  | 75                  | 295609.4     | 2.54                            | 1.00 (reference)                                       | 1.00 (reference)     | 1.00 (reference)     |
| Tertile 2 (3.00–3.25)                  | 75                  | 285784.8     | 2.62                            | 1.04 (0.75, 1.43)                                      | 1.00 (0.72, 1.39)    | 1.01 (0.72, 1.40)    |
| Tertile 3 (3.50–5.00)                  | 102                 | 458958.2     | 2.22                            | 0.87 (0.65, 1.18)                                      | 0.82 (0.59, 1.14)    | 0.82 (0.59, 1.15)    |
| <i>P</i> <sub>trend</sub>              |                     |              |                                 | 0.3018                                                 | 0.1887               | 0.1916               |
| Continuous (1-point increment)         | 252                 | 1040352.3    | 2.42                            | 0.89 (0.74, 1.07)                                      | 0.85 (0.69, 1.04)    | 0.84 (0.69, 1.04)    |

Abbreviation: WCRF/AICR, World Cancer Research Fund and American Institute for Cancer Research.

<sup>a</sup> Adjusted for variables determined by change-in-estimate strategy, namely age (years), sex (male, female), smoking status (current, former, never), history of diabetes (yes, no), and total energy intake (kcal/day).

<sup>b</sup> Adjusted for age (years), sex (male, female), race (non-Hispanic white, non-Hispanic black, Hispanic, others), educational level (college below, college graduate, postgraduate), smoking status (current, former, never), aspirin use (yes, no), history of diabetes (yes, no), family history of pancreatic cancer (yes, no), and total energy intake (kcal/day). For the association of dietary WCRF/AICR score with pancreatic cancer mortality, model 2 was further adjusted for body mass index (kg/m<sup>2</sup>) and moderate to vigorous activity (min/week).

**Supplemental Table 6.** Sensitivity analyses on the association between WCRF/AICR score and pancreatic cancer mortality

| Tertiles of WCRF/AICR score<br>(range) | Subdistribution hazard ratio (95% confidence interval) <sup>a</sup>             |                                                                                     |
|----------------------------------------|---------------------------------------------------------------------------------|-------------------------------------------------------------------------------------|
|                                        | Excluding deaths occurring<br>within the first two years of<br>follow-up (n=38) | Excluding subjects with<br>extreme values of energy<br>intake (n=2684) <sup>b</sup> |
| Overall WCRF/AICR score                |                                                                                 |                                                                                     |
| Tertile 1                              | 1.00 (reference)                                                                | 1.00 (reference)                                                                    |
| Tertile 2                              | 1.01 (0.76, 1.34)                                                               | 0.94 (0.72, 1.24)                                                                   |
| Tertile 3                              | 0.66 (0.47, 0.94)                                                               | 0.65 (0.47, 0.90)                                                                   |
| <i>P</i> <sub>trend</sub>              | 0.0308                                                                          | 0.0134                                                                              |
| Continuous (1-point increment)         | 0.89 (0.78, 1.01)                                                               | 0.87 (0.77, 0.99)                                                                   |
| Dietary WCRF/AICR score                |                                                                                 |                                                                                     |
| Tertile 1                              | 1.00 (reference)                                                                | 1.00 (reference)                                                                    |
| Tertile 2                              | 1.14 (0.83, 1.56)                                                               | 1.05 (0.78, 1.42)                                                                   |
| Tertile 3                              | 0.84 (0.61, 1.17)                                                               | 0.85 (0.62, 1.15)                                                                   |
| <i>P</i> <sub>trend</sub>              | 0.2451                                                                          | 0.2027                                                                              |
| Continuous (1-point increment)         | 0.85 (0.69, 1.04)                                                               | 0.84 (0.70, 1.02)                                                                   |

Abbreviation: WCRF/AICR, World Cancer Research Fund and American Institute for Cancer Research.

<sup>a</sup> Adjusted for age (years), sex (male, female), race (non-Hispanic white, non-Hispanic black, Hispanic, others), educational level (college below, college graduate, postgraduate), smoking status (current, former, never), aspirin use (yes, no), history of diabetes (yes, no), family history of pancreatic cancer (yes, no), and total energy intake (kcal/day). For the association of dietary WCRF/AICR score with pancreatic cancer mortality, model 2 was further adjusted for body mass index (kg/m<sup>2</sup>) and moderate to vigorous activity (min/week).

<sup>b</sup> Extreme values of energy intake are defined as <800 or >4000 kcal/d for men and <500 or >3500 kcal/d for women.



**Supplemental Table 7.** Associations of adherence to individual WCRF/AICR cancer prevention recommendations with pancreatic cancer mortality

| WCRF/AICR components                                          | Number of deaths | Person-years | Subdistribution hazard ratio (95% confidence interval) <sup>a</sup> | <i>P</i> <sub>trend</sub> |
|---------------------------------------------------------------|------------------|--------------|---------------------------------------------------------------------|---------------------------|
| Be a healthy weight                                           |                  |              |                                                                     |                           |
| 0                                                             | 76               | 294707.7     | 1.00 (reference)                                                    | 0.7576                    |
| 0.5                                                           | 130              | 547862.5     | 0.90 (0.68, 1.21)                                                   |                           |
| 1                                                             | 101              | 437178.3     | 0.94 (0.69, 1.29)                                                   |                           |
| Be physically active                                          |                  |              |                                                                     |                           |
| 0                                                             | 162              | 565417.0     | 1.00 (reference)                                                    | 0.0542                    |
| 0.5                                                           | 64               | 282481.4     | 0.91 (0.67, 1.21)                                                   |                           |
| 1                                                             | 81               | 431850.1     | 0.77 (0.58, 1.01)                                                   |                           |
| Eat a diet rich in whole grains, vegetables, fruit, and beans |                  |              |                                                                     |                           |
| 0                                                             | 25               | 85570.7      | 1.00 (reference)                                                    | 0.5663                    |
| 0.25                                                          | 60               | 271174.9     | 0.82 (0.51, 1.32)                                                   |                           |
| 0.5                                                           | 61               | 253982.9     | 0.92 (0.57, 1.48)                                                   |                           |
| 0.75                                                          | 142              | 561065.9     | 1.04 (0.65, 1.66)                                                   |                           |
| 1                                                             | 19               | 107954.1     | 0.76 (0.37, 1.55)                                                   |                           |
| Limit consumption of ultra-processed foods                    |                  |              |                                                                     |                           |
| 0                                                             | 108              | 427847.6     | 1.00 (reference)                                                    | 0.8350                    |
| 0.5                                                           | 90               | 428087.2     | 0.84 (0.61, 1.16)                                                   |                           |
| 1                                                             | 109              | 423813.6     | 1.02 (0.70, 1.48)                                                   |                           |
| Limit consumption of red and processed meat                   |                  |              |                                                                     |                           |
| 0                                                             | 6                | 8507.7       | 1.00 (reference)                                                    | 0.1935                    |
| 0.5                                                           | 88               | 337777.7     | 0.36 (0.15, 0.84)                                                   |                           |
| 1                                                             | 213              | 933463.1     | 0.33 (0.14, 0.78)                                                   |                           |
| Limit consumption of sugar-sweetened drinks                   |                  |              |                                                                     |                           |
| 0                                                             | 70               | 258937.7     | 1.00 (reference)                                                    | 0.1010                    |
| 0.5                                                           | 205              | 865460.8     | 0.86 (0.64, 1.13)                                                   |                           |
| 1                                                             | 32               | 155350.0     | 0.70 (0.45, 1.08)                                                   |                           |
| Limit alcohol consumption                                     |                  |              |                                                                     |                           |
| 0                                                             | 42               | 161990.0     | 1.00 (reference)                                                    | 0.2955                    |
| 0.5                                                           | 189              | 803104.4     | 0.86 (0.60, 1.22)                                                   |                           |
| 1                                                             | 76               | 314654.1     | 0.80 (0.53, 1.20)                                                   |                           |
| For mothers: breastfeed your baby, if you can                 |                  |              |                                                                     |                           |
| 0                                                             | 54               | 275890.6     | 1.00 (reference)                                                    | 0.8152                    |
| 0.5                                                           | 42               | 181824.4     | 1.12 (0.74, 1.67)                                                   |                           |
| 1                                                             | 39               | 211517.7     | 0.94 (0.62, 1.43)                                                   |                           |

<sup>a</sup> Adjustment for age (years), sex (male, female) (except the component “for mothers: breastfeed your baby, if you can”), race (non-Hispanic white, non-Hispanic black, Hispanic, others), educational level (college below, college graduate, postgraduate), smoking status (current, former, never), aspirin use (yes, no), history of diabetes (yes, no), family history of pancreatic cancer (yes, no), and energy intake from diet (kcal/day). All WCRF/AICR components were mutually adjusted.

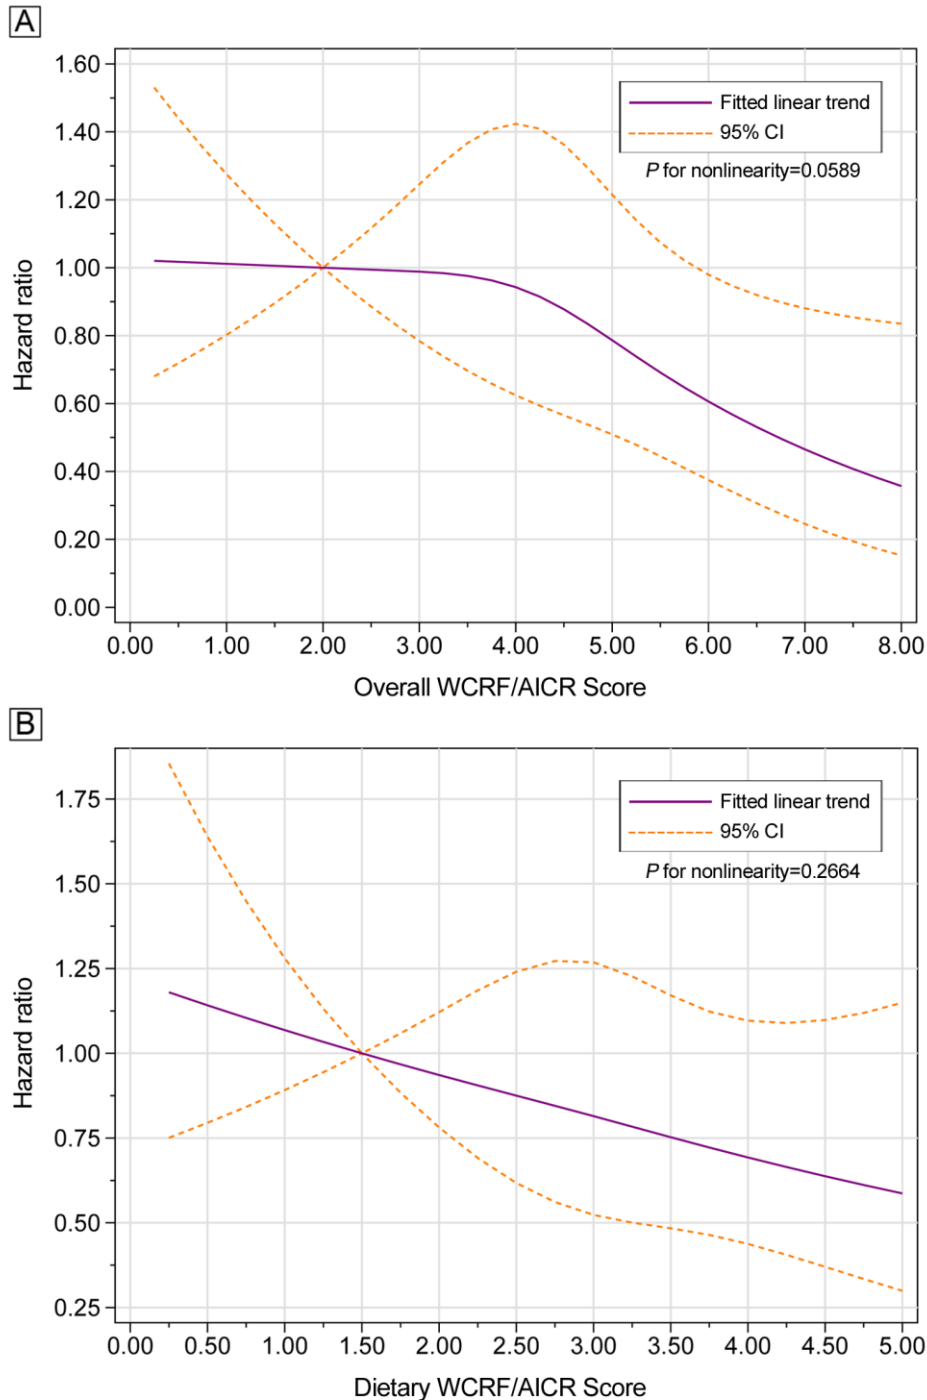

**Supplemental Figure 1** Dose–response analyses on WCRF/AICR scores and pancreatic cancer incidence. The referents were set as 2.00 and 1.50 for overall and dietary WCRF/AICR scores, respectively. Hazard ratio was adjusted for age, sex, race, educational degree, smoking status, aspirin use, history of diabetes, family history of pancreatic cancer, and energy intake from diet. For the dose–response analysis on the dietary WCRF/AICR score, hazard ratio was further adjusted for body mass index and physical activity level. The purple solid line represents the fitted linear trend, and the orange short-dash line represents 95% CI. WCRF/AICR, World Cancer Research Fund/American Institute for Cancer Research; CI, confidence interval.

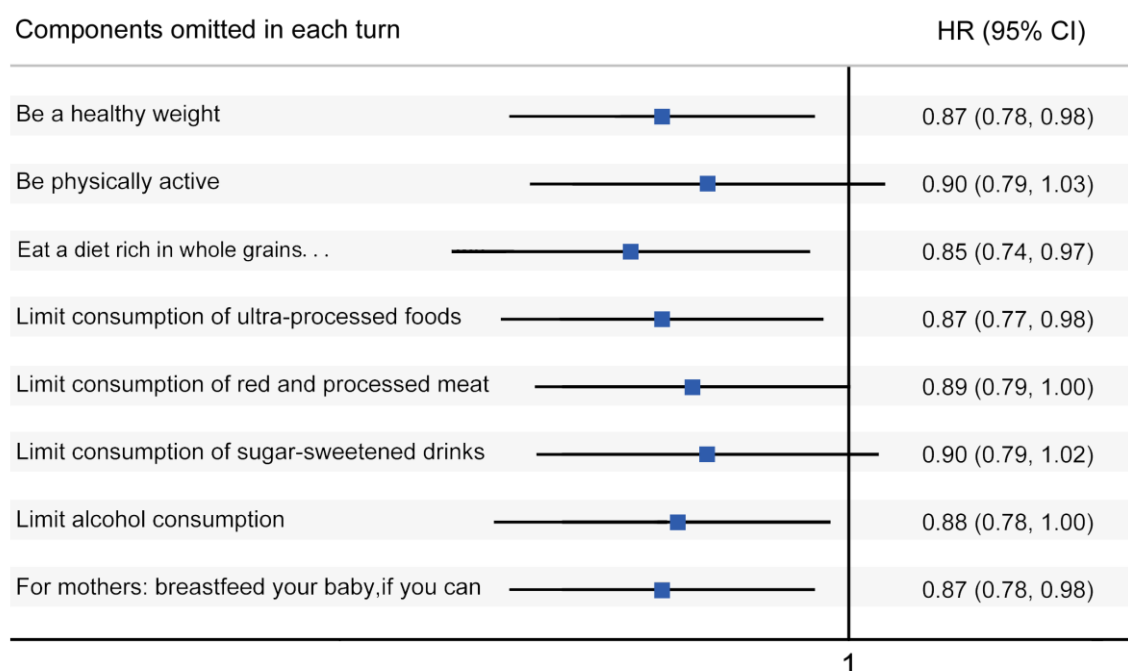

**Supplemental Figure 2** Explanatory analysis: ignoring a single component in turn to determine their relative importance in the overall WCRF/AICR score. The component shown on the left is the one left out in each turn. The square with dark blue color represents the HR after ignoring a single component, and the corresponding black line represents its 95% CI. HR represents risk estimate per 1-point increment in the overall WCRF/AICR score, and was adjusted for age, sex, race, educational degree, smoking status, aspirin use, history of diabetes, family history of pancreatic cancer, and energy intake from diet. All WCRF/AICR components were mutually adjusted. WCRF/AICR, World Cancer Research Fund/American Institute for Cancer Research; HR, hazard ratio; CI, confidence interval.

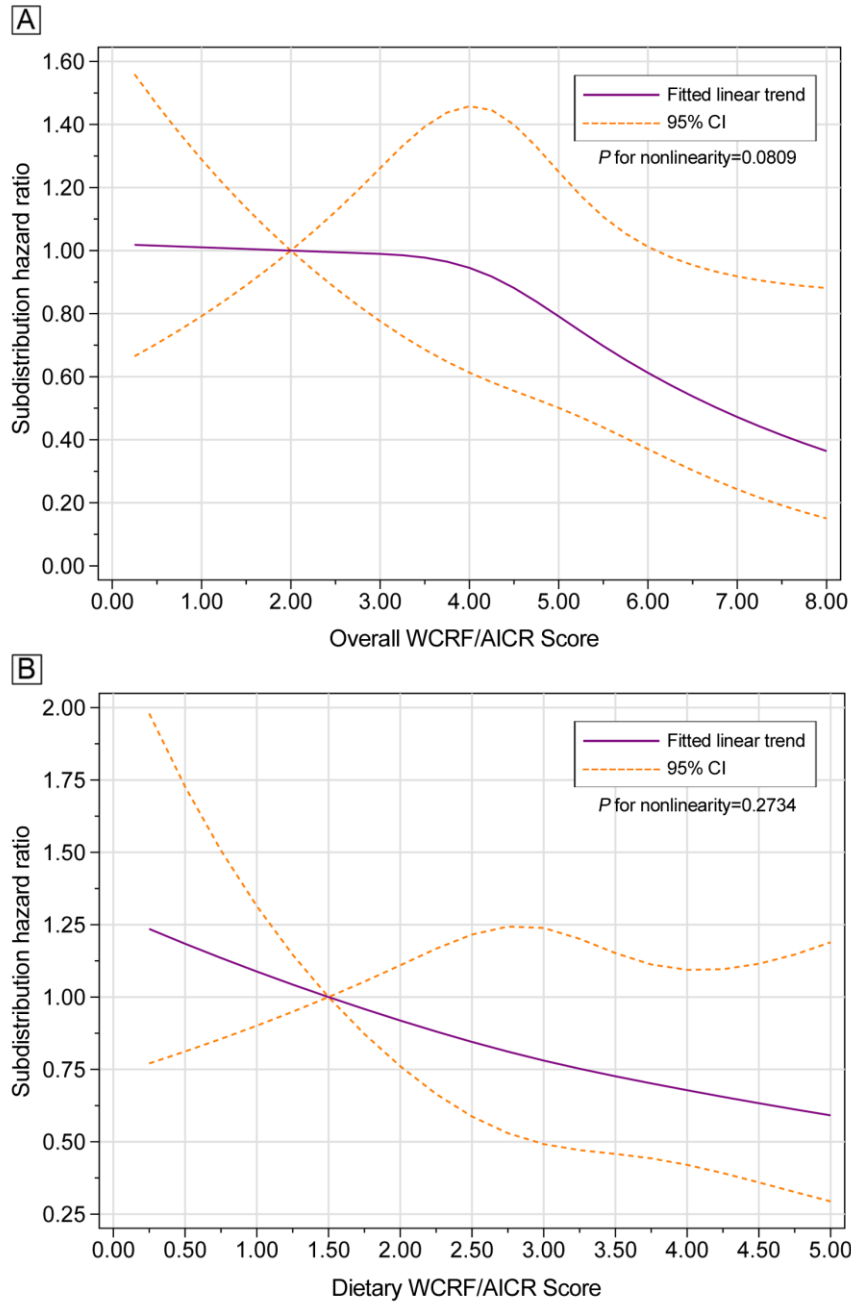

**Supplemental Figure 3** Dose–response analyses on WCRF/AICR scores and pancreatic cancer mortality. The referents were set as 2.00 and 1.50 for overall and dietary WCRF/AICR scores, respectively. Subdistribution hazard ratio was adjusted for age, sex, race, educational degree, smoking status, aspirin use, history of diabetes, family history of pancreatic cancer, and energy intake from diet. For the dose–response analysis on the dietary WCRF/AICR score, subdistribution hazard ratio was further adjusted for body mass index and physical activity level. The purple solid line represents the fitted linear trend, and the orange short-dash line represents 95% CI. WCRF/AICR, World Cancer Research Fund/American Institute for Cancer Research; CI, confidence interval.

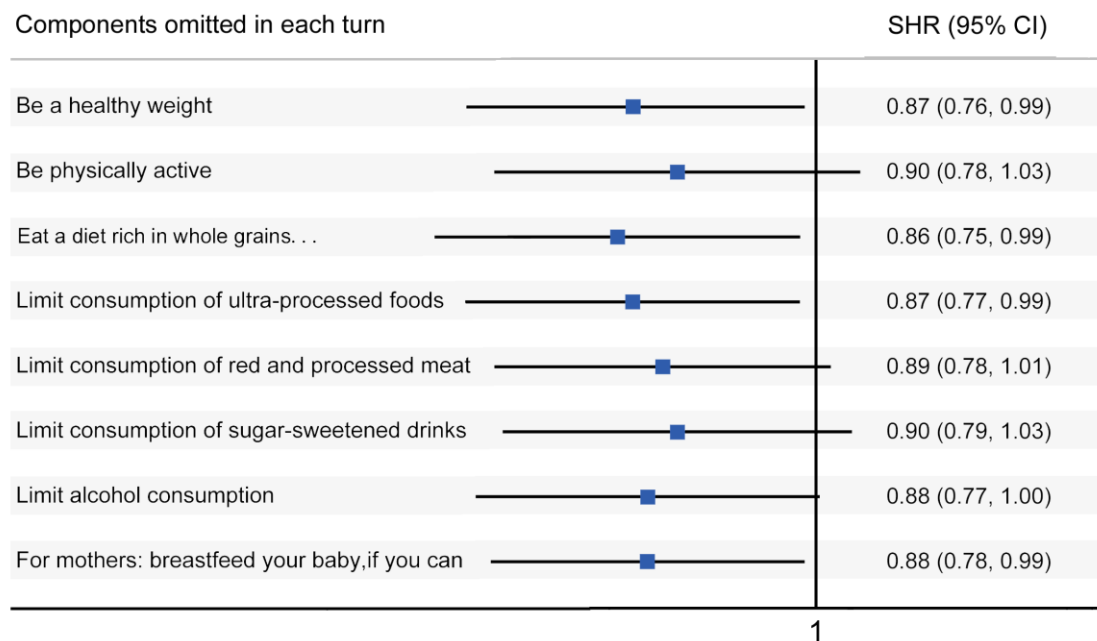

**Supplemental Figure 4** Explanatory analysis: ignoring a single component in turn to determine their relative importance in the overall WCRF/AICR score. The component shown on the left is the one left out in each turn. The square with dark blue color represents the SHR after ignoring a single component, and the corresponding black line represents its 95% CI. SHR represents risk estimate per 1-point increment in the overall WCRF/AICR score, and was adjusted for age, sex, race, educational degree, smoking status, aspirin use, history of diabetes, family history of pancreatic cancer, and energy intake from diet. All WCRF/AICR components were mutually adjusted. WCRF/AICR, World Cancer Research Fund/American Institute for Cancer Research; SHR, subdistribution hazard ratio; CI, confidence interval.
